# Supplementary material for: Improved on/off ratio in interface-type memristors with an ion irradiation-induced large Schottky barrier for neuromorphic computing
Source: Royal Society of Chemistry journal article supplement (doi:10.1039/d5tc03702f), 2025-12-30
Supplement: d5tc03702f1.pdf [file d5tc03702f1.pdf]

## Supporting Information

# **Improved ON/OFF Ratio in Interface-Type Memristors with Ion Irradiation-Induced Large Schottky Barrier for Neuromorphic Computing**

Ruowei Wang<sup>1</sup>, Jie Su<sup>2\*</sup>, Yong Liu<sup>3\*</sup>, Minghui Xu<sup>2</sup>, Minghao Zhang<sup>1</sup>, Pengshun Shan<sup>2</sup>, Weijin Kong<sup>1\*</sup>, Yuyi Li<sup>2</sup>, Hao Wu<sup>1</sup>, Tao Liu<sup>2\*</sup>

<sup>1</sup> College of Physics Science, Qingdao University, Qingdao 266071, People's Republic of China

<sup>2</sup> College of Electronic and Information Engineering, Qingdao University, Qingdao 266071, People's Republic of China

<sup>3</sup> Shandong Provincial Key Laboratory of Nuclear Science, Nuclear Energy Technology and Comprehensive Utilization, School of Nuclear Science, Energy and Power Engineering, Shandong University, Jinan 250061, People's Republic of China

\* Corresponding authors. E-mail addresses: jsu@qdu.edu.cn (J. Su), yongliu@sdu.edu.cn (Y. Liu), kwjkd@163.com (W. Kong), liutao@qdu.edu.cn (T. Liu).

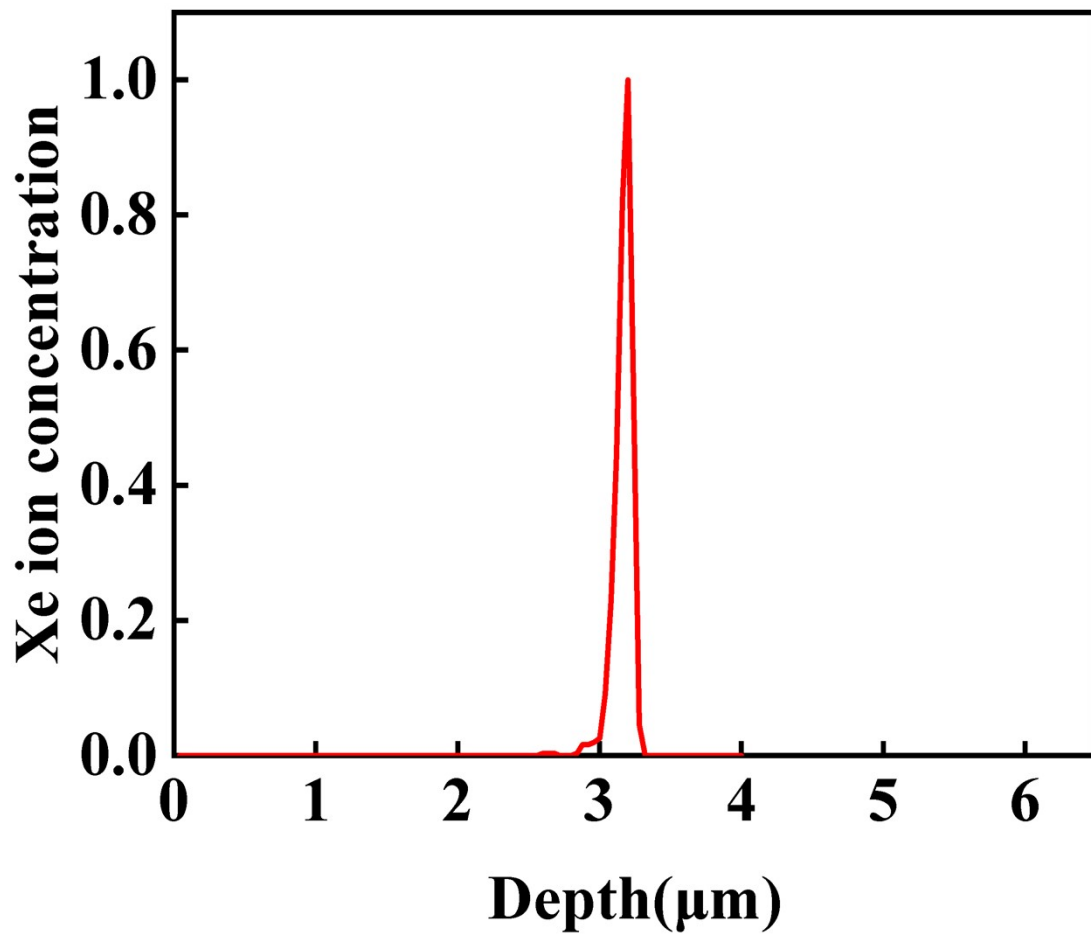

**Figure. S1** The normalized curve of ion concentration distribution as a function of depth.

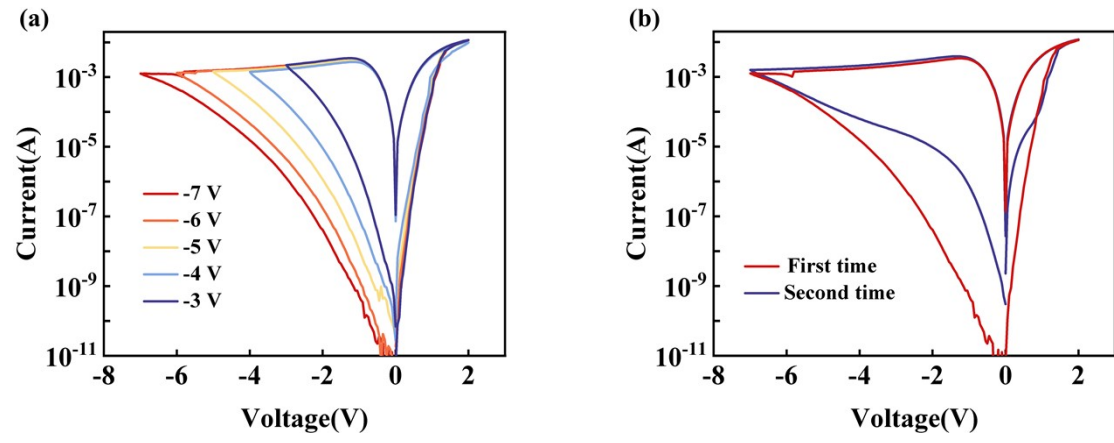

**Figure. S2.** (a) The  $I$ - $V$  curves under different negative voltages. (b)  $I$ - $V$  curves for the initial and subsequent sweeps at -7 V.

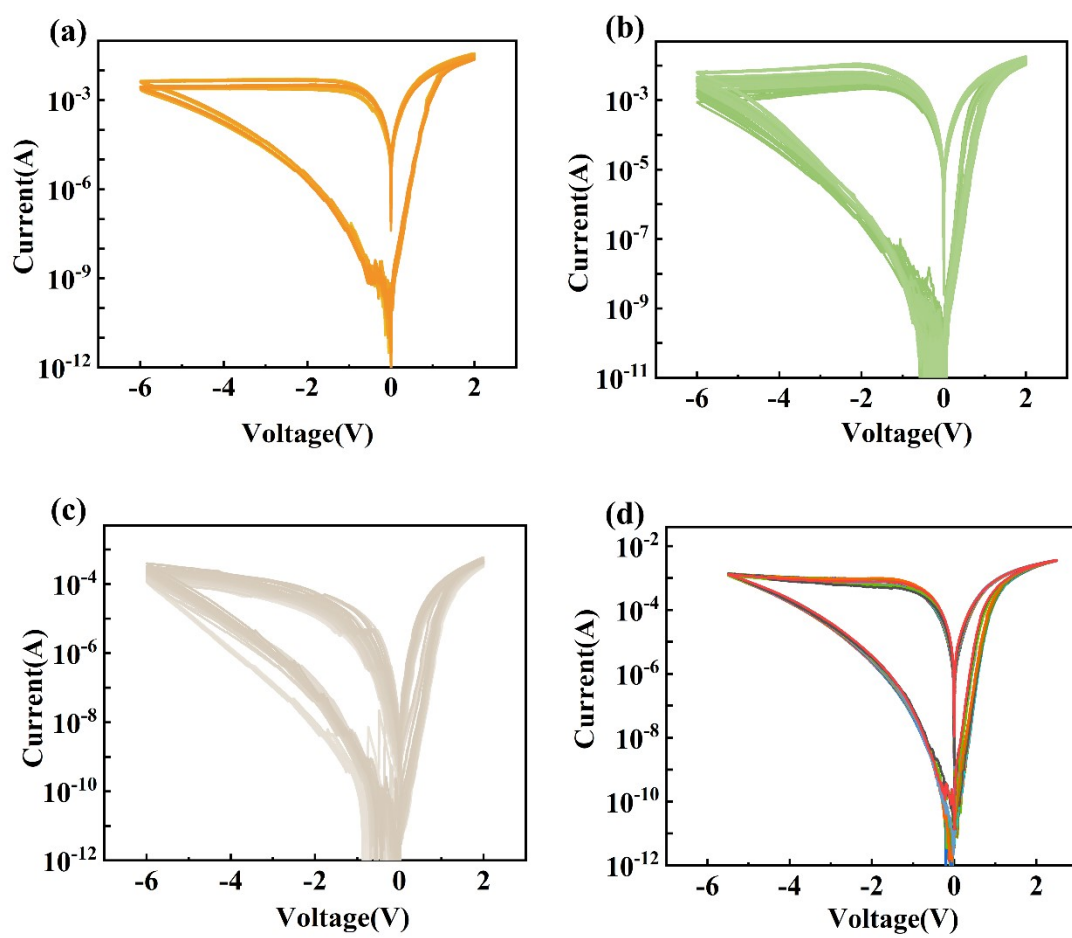

**Figure. S3.** 100  $I$ - $V$  cycle curves of (a)  $D_0$ , (b)  $D_1$ , (c)  $D_2$ , and (d)  $D_3$ .

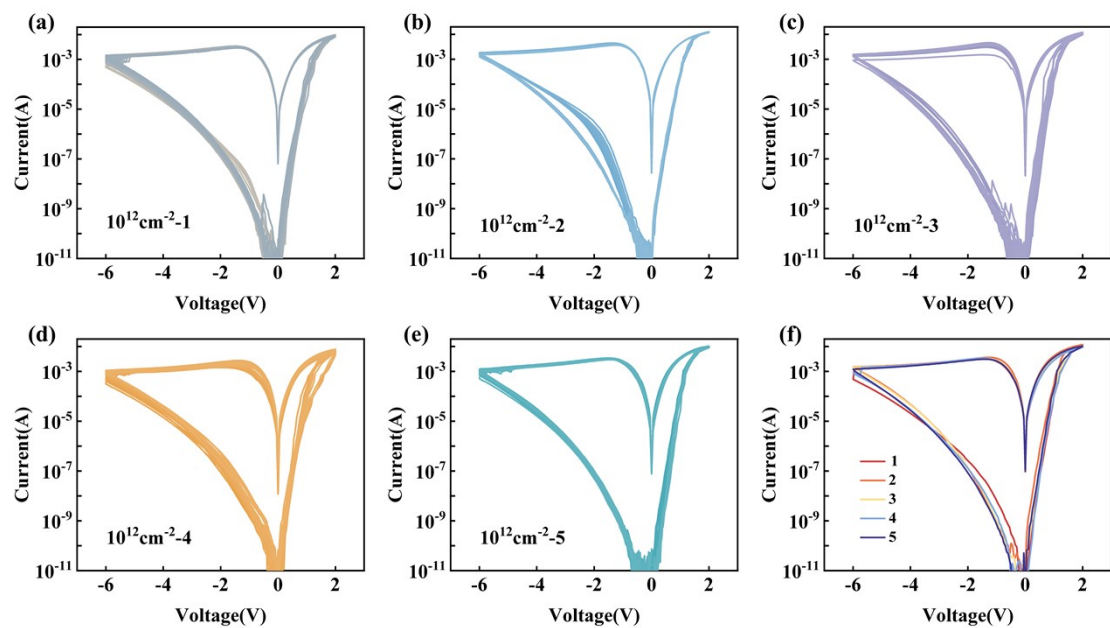

**Figure. S4.** The  $I$ - $V$  curve cycles of device (a) 1, (b) 2, (c) 3, (d) 4, (e) 5. (f) Comparison of  $I$ - $V$  curves of five devices.

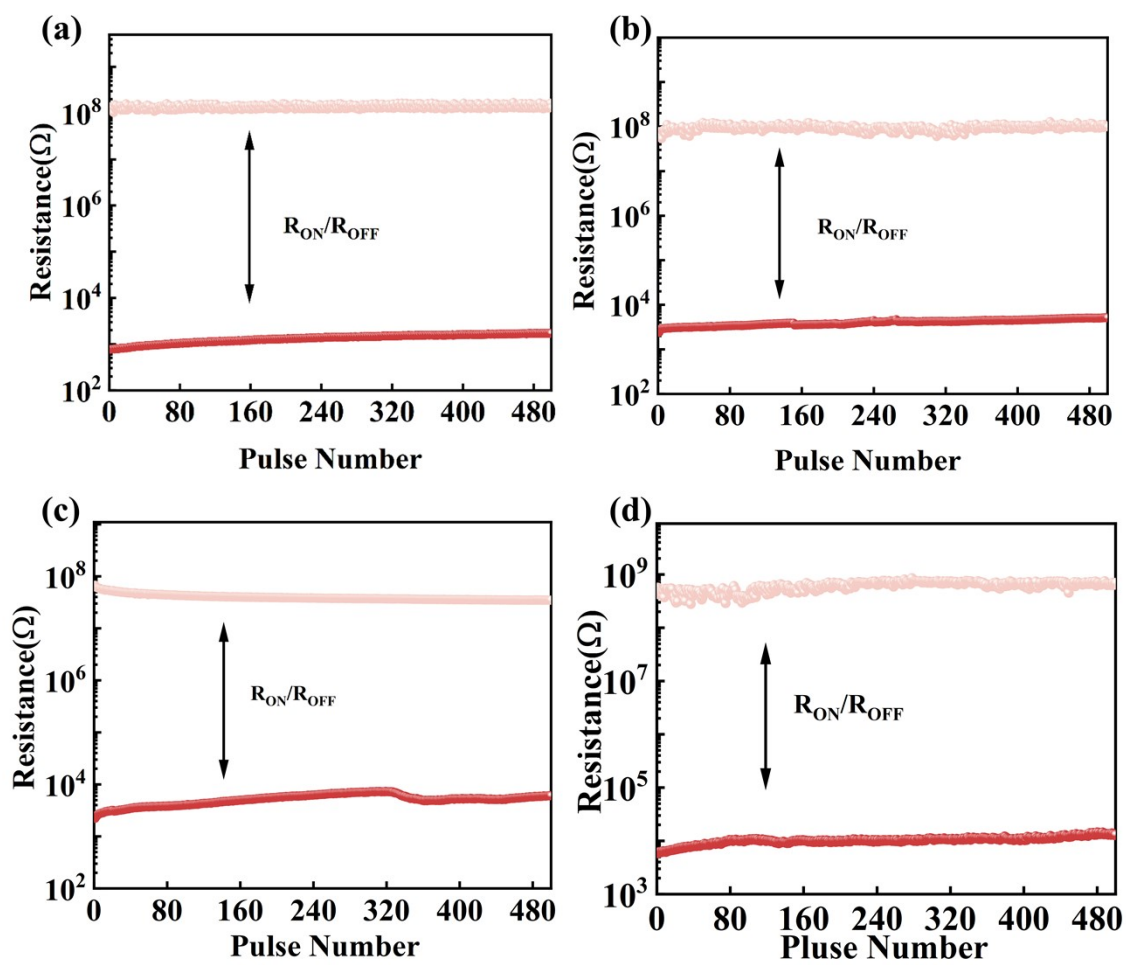

**Figure. S5.** The on/off ratio of (a)  $D_0$ , (b)  $D_1$ , (c)  $D_2$ , and (d)  $D_3$ .

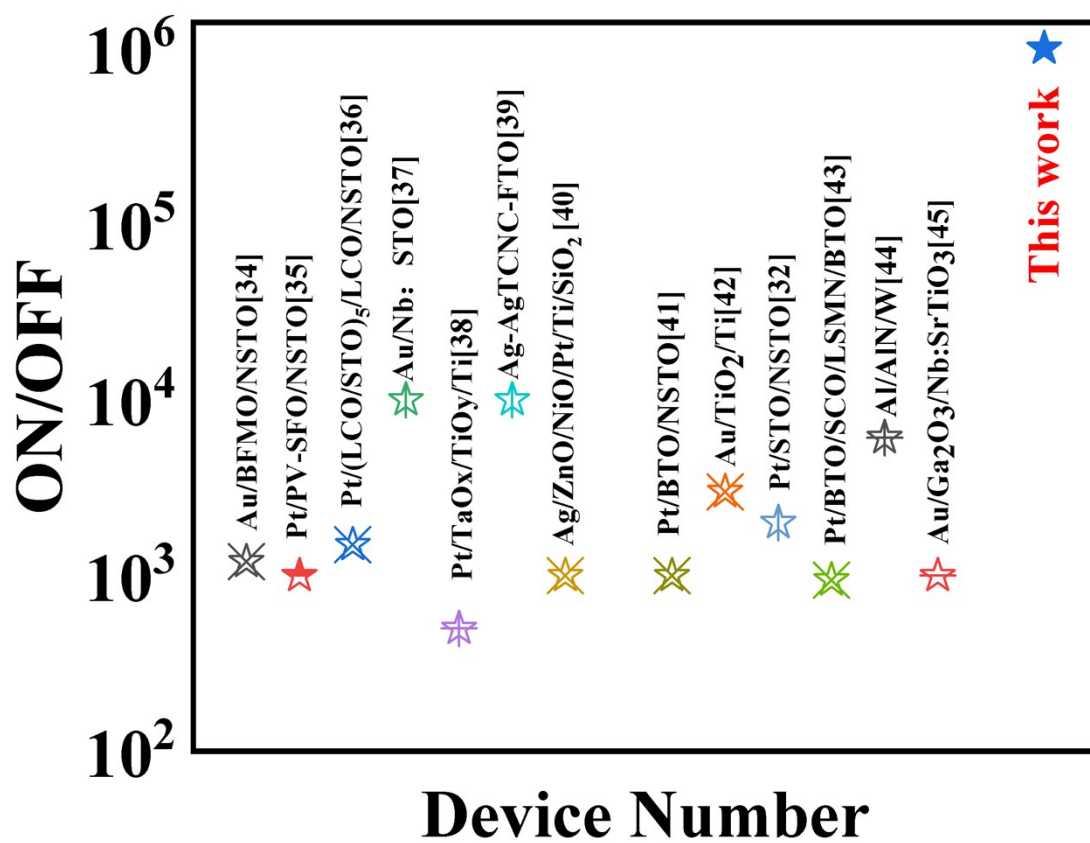

**Figure. S6.** Comparison of switching ratio between D<sub>4</sub> device and other memristors.

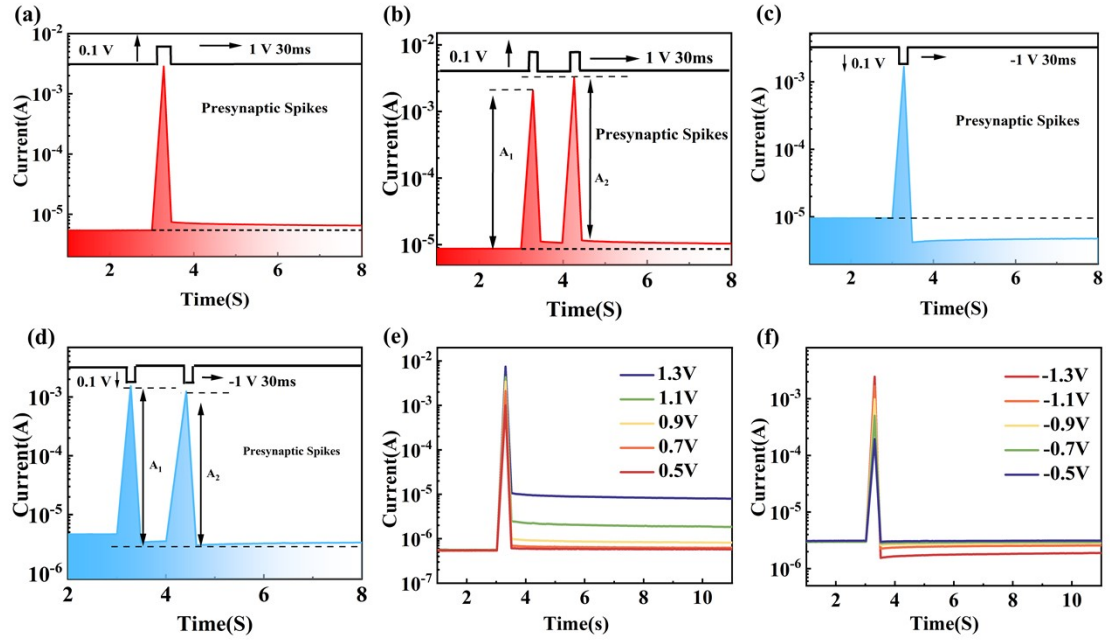

**Figure.S7.** EPSC stimulated with (a) a single and (b) two positive pulse amplitudes on D<sub>4</sub>. IPSC stimulated with (c) a single and (d) two negative pulse amplitudes on D<sub>4</sub>. (e) EPSC and (f) IPSC stimulated with different pulse amplitudes.



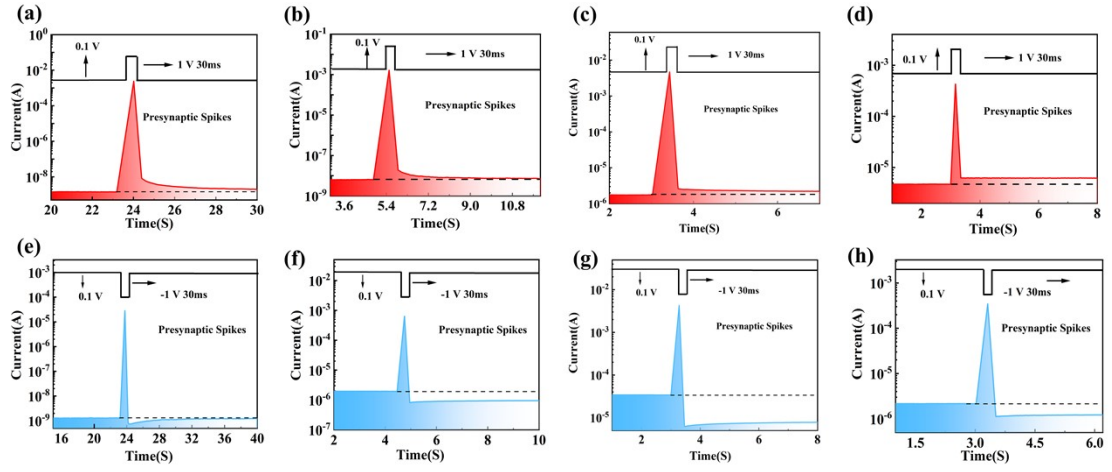

**Figure. S8.** EPSC stimulated with a single positive pulse amplitude on (a)  $D_0$ , (b)  $D_1$ , (c)  $D_2$ , and (d)  $D_3$ . IPSC stimulated with a single negative pulse amplitude on (e)  $D_0$ , (f)  $D_1$ , (g)  $D_2$ , and (h)  $D_3$ .

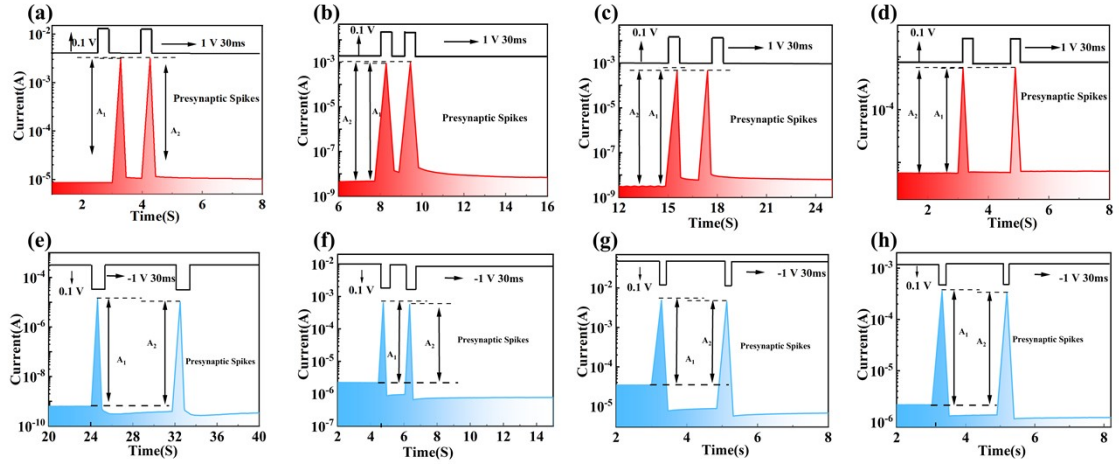

**Figure. S9.** EPSC stimulated with two positive pulse amplitudes on (a)  $D_0$ , (b)  $D_1$ , (c)  $D_2$ , and (d)  $D_3$ . IPSC stimulated with two negative pulse amplitudes on (e)  $D_0$ , (f)  $D_1$ , (g)  $D_2$ , and (h)  $D_3$ .

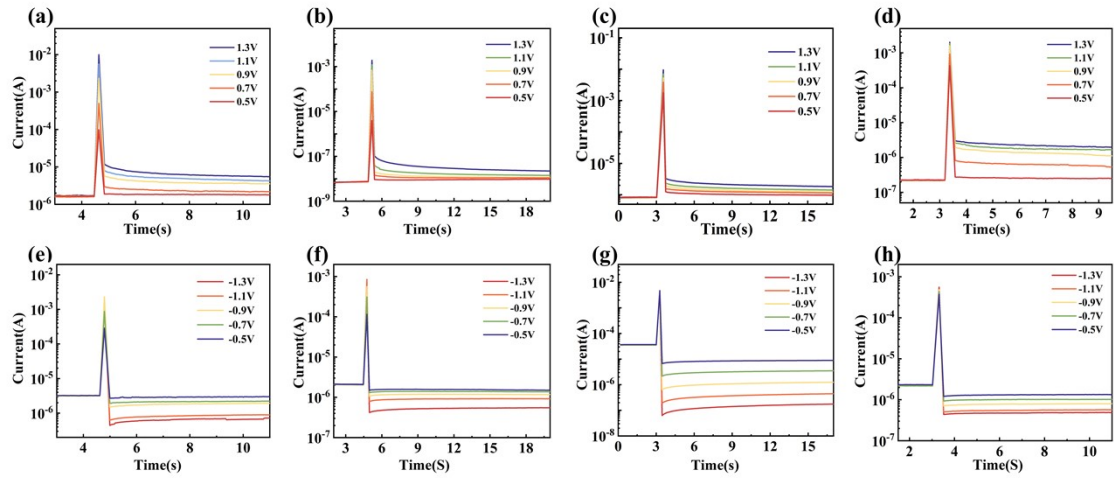

**Figure. S10.** EPSC stimulated with different pulse amplitudes on (a)  $D_0$ , (b)  $D_1$ , (c)  $D_2$ , and (d)  $D_3$ . IPSC stimulated with different pulse amplitudes on (a)  $D_0$ , (b)  $D_1$ , (c)  $D_2$ , and (d)  $D_3$ .

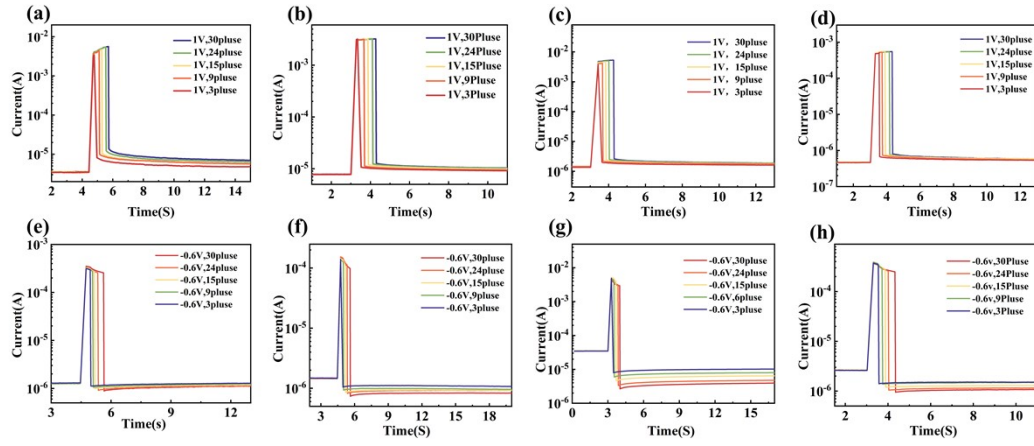

**Fi**

**Figure S11.** EPSC stimulated with different numbers of pulses on (a)  $D_0$ , (b)  $D_1$ , (c)  $D_2$ , and (d)  $D_3$ . IPSC stimulated with different numbers of pulses on (a)  $D_0$ , (b)  $D_1$ , (c)  $D_2$ , and (d)  $D_3$ .

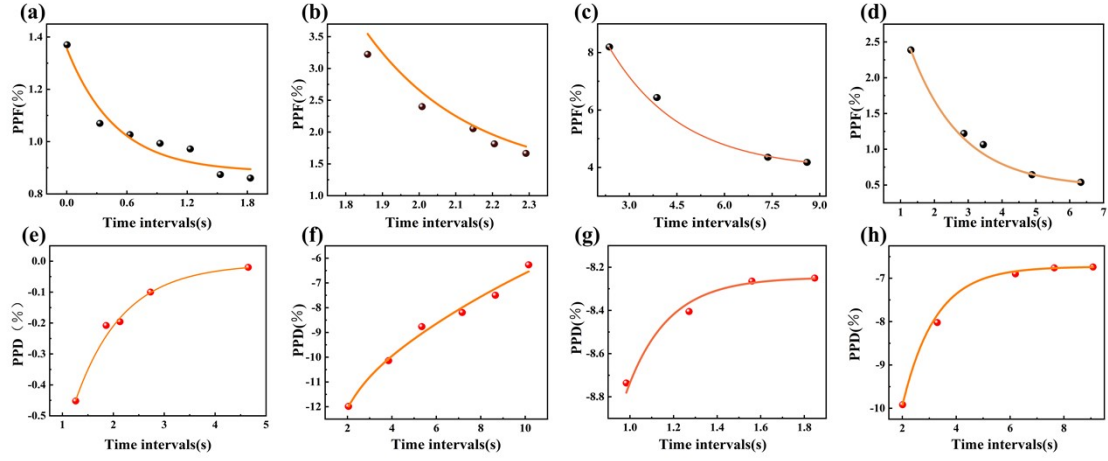

**Figure. S12.** PPF index as a function of  $\Delta t$  with (a)  $D_0$ , (b)  $D_1$ , (c)  $D_2$ , and (d)  $D_3$ . PPD index as a function of  $\Delta t$  with (a)  $D_0$ , (b)  $D_1$ , (c)  $D_2$ , and (d)  $D_3$ .

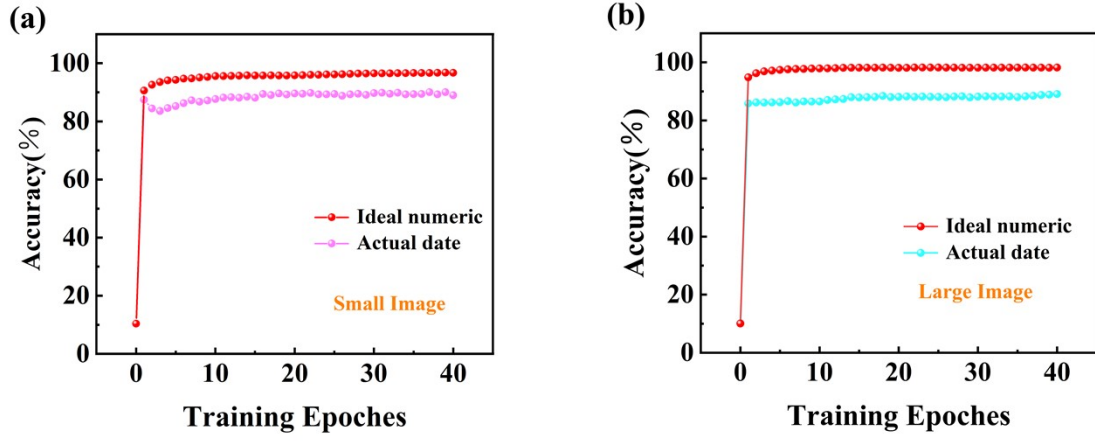

**Figure. S13.** (a) Training accuracy to small image of the  $D_4$ . (b) Accuracy after adding noise to large image of  $D_4$ .

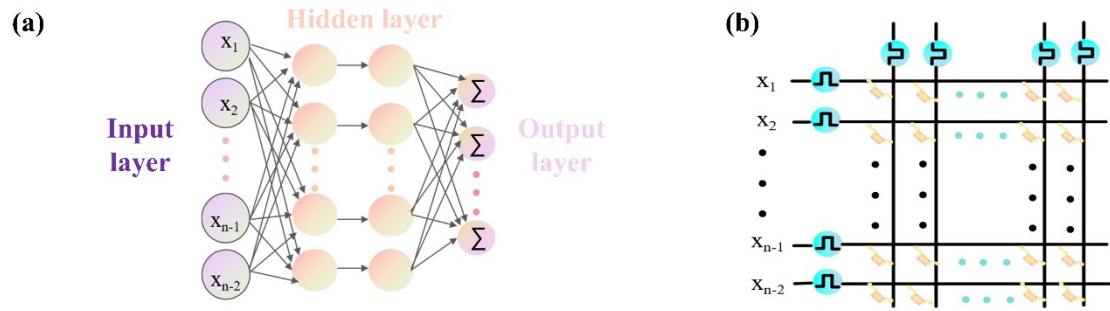

**Figure. S14.** Schematic diagram of (a) neural network and (b) crossbar neural nucleus with memristor as nodes.
